# Supplementary material for: Comprehensive evaluation of physiological response and cold tolerance of domesticated Cinnamomum camphora (L.) Presl under low temperature stress
Source: PeerJ journal article supplement (doi:10.7717/peerj.18590), 2024-11-28
Supplement: Raw_data_CAT_activity.xlsx [file Raw_data_CAT_activity.xlsx]

## Sheet: Relative conducitivy 
Tree age（Unit：%）
Treatment temperature	1y.	5y.	10y.	15y.								4℃	0℃	-5℃	-10℃	-15℃	-20℃
4	26.26	18.98	16.65	13.98							1y.	26.26	30.71	37.36	44.16	63.21	86.43
0	30.71	21.17	19.71	19.24							5y.	18.98	21.17	30.28	42.34	61.28	85.56
-5	37.36	30.28	27.36	27.18							10y.	16.65	19.71	27.36	40.49	58.34	81.23
-10	44.16	42.34	40.49	34.24							15y.	13.98	19.24	27.18	34.24	52.05	76.24
-15	63.21	61.28	58.34	52.05
-20	86.43	85.56	81.23	76.24

## Sheet: CAT
Tree age	CAT activity at different temperatures（Unit：U/g）
	4℃	0℃	-5℃	-10℃	-15℃	-20℃
1y.	145.16	103.26	179.23	218.18	326.53	24.47
5y.	148.16	111.26	179.23	248.18	346.53	20.47
10y.	161.21	134.17	228.62	275.74	387.84	27.26
15y.	191.21	164.17	268.62	335.74	457.84	37.26
