# Supplementary material for: Comprehensive evaluation of physiological response and cold tolerance of domesticated Cinnamomum camphora (L.) Presl under low temperature stress
Source: PeerJ journal article supplement (doi:10.7717/peerj.18590), 2024-11-28
Supplement: Raw_data_Malondialdehyde_content.xlsx [file Raw_data_Malondialdehyde_content.xlsx]

## Sheet: Relative conducitivy 
Tree age（Unit：%）
Treatment temperature	1y.	5y.	10y.	15y.								4℃	0℃	-5℃	-10℃	-15℃	-20℃
4	26.26	18.98	16.65	13.98							1y.	26.26	30.71	37.36	44.16	63.21	86.43
0	30.71	21.17	19.71	19.24							5y.	18.98	21.17	30.28	42.34	61.28	85.56
-5	37.36	30.28	27.36	27.18							10y.	16.65	19.71	27.36	40.49	58.34	81.23
-10	44.16	42.34	40.49	34.24							15y.	13.98	19.24	27.18	34.24	52.05	76.24
-15	63.21	61.28	58.34	52.05
-20	86.43	85.56	81.23	76.24

## Sheet: MDA
		Malondialdehyde content at different temperatures（mmol/g)
	Tree age	4℃	0℃	-5℃	-10℃	-15℃	-20℃
	1y.	12.1	15.9	10.53	25.2	31.3	36.47
	5y.	9.93	11.56	8.64	15.42	19.05	21.32
	10y.	4.11	5.69	3.06	7.89	8.56	10.58
	15y.	3.25	4.08	2.05	5.35	5.89	8.13
