# Supplementary material for: Comprehensive evaluation of physiological response and cold tolerance of domesticated Cinnamomum camphora (L.) Presl under low temperature stress
Source: PeerJ journal article supplement (doi:10.7717/peerj.18590), 2024-11-28
Supplement: Raw_data_Relative_conducitivy.xlsx [file Raw_data_Relative_conducitivy.xlsx]

## Sheet: Relative conducitivy 
		Relative conducitivy at different temperatures（Unit：%）
	Tree age	4℃	0℃	-5℃	-10℃	-15℃	-20℃
	1y.	26.26	30.71	37.36	44.16	63.21	86.43
	5y.	18.98	21.17	30.28	42.34	61.28	85.56
	10y.	16.65	19.71	27.36	40.49	58.34	81.23
	15y.	13.98	19.24	27.18	34.24	52.05	76.24
