# Supplementary material for: Comprehensive evaluation of physiological response and cold tolerance of domesticated Cinnamomum camphora (L.) Presl under low temperature stress
Source: PeerJ journal article supplement (doi:10.7717/peerj.18590), 2024-11-28
Supplement: Raw_data_Relative_water_content.xlsx [file Raw_data_Relative_water_content.xlsx]

## Sheet: Relative conducitivy 
Tree age（Unit：%）
Treatment temperature	1y.	5y.	10y.	15y.								4℃	0℃	-5℃	-10℃	-15℃	-20℃
4	26.26	18.98	16.65	13.98							1y.	26.26	30.71	37.36	44.16	63.21	86.43
0	30.71	21.17	19.71	19.24							5y.	18.98	21.17	30.28	42.34	61.28	85.56
-5	37.36	30.28	27.36	27.18							10y.	16.65	19.71	27.36	40.49	58.34	81.23
-10	44.16	42.34	40.49	34.24							15y.	13.98	19.24	27.18	34.24	52.05	76.24
-15	63.21	61.28	58.34	52.05
-20	86.43	85.56	81.23	76.24

## Sheet: relative water content 
			Relative water content at different temperatures（Unit：%）
		Tree age	4℃	0℃	-5℃	-10℃	-15℃	-20℃
		1y.	95.35	71.36	54.67	43.12	26.03	23.03
		5y.	88.12	63.27	45.35	33.12	15.13	11.25
		10y.	78.35	55.16	40.43	28.12	14.43	9.35
		15y.	65.92	49.67	34.89	23.12	11.21	8.15

## Sheet: raw 
	conducitivy	CAT	MDA	SOD	POD	protein	sugar	proline	relative water	X1			Chlorophyll content
0	26.26	145.16	12.1	320.35	280.28	3.51	9.64	55.83	95.35		-1.51156	-0.72567	0.34343	95.35	88.12	78.35	65.92
0	30.71	103.26	15.9	380.19	242.24	6.24	15.37	68.95	71.36		-1.15259	-0.9726	0.14846	71.36	63.27	55.16	49.67
0	37.36	179.23	10.53	420.61	344.43	9.44	26.63	95.38	54.67		-0.73418	-0.37809	0.15338	54.67	45.35	40.43	34.89
0	44.16	218.18	25.2	550.26	393.45	14.23	45.49	219.19	43.12		0.01323	-0.51501	1.29848	43.12	33.12	28.12	23.12
0	63.21	326.53	31.3	315.35	225.26	17.34	52.74	321.28	26.03		0.5697	-1.16652	2.45936	26.03	15.13	14.43	11.21
0	86.43	24.47	36.47	216.24	231.36	25.15	55.61	381.23	23.03		0.96941	-2.09829	0.31857	23.03	11.25	9.35	8.15
1	18.98	148.16	9.93	612.21	305.15	4.45	16.82	65.32	88.12		-1.40919	-0.31255	0.0797
1	21.17	111.26	11.56	721.12	316.26	7.11	27.36	76.96	63.27		-1.01799	-0.29511	-0.28067
1	30.28	179.23	8.64	1156.67	414.59	13.13	40.48	135.32	45.35		-0.42576	0.46966	-0.27169
1	42.34	248.18	15.42	813.51	518.26	17.07	53.53	236.79	33.12		0.19689	0.40997	0.62879
1	61.28	346.53	19.05	729.12	347.46	22.03	59.48	365.33	15.13		0.83884	-0.12297	1.47076
1	85.56	20.47	21.32	226.21	269.84	26.24	68.32	425.93	11.25		1.14081	-1.49869	-1.0288
2	16.65	161.21	4.11	635.23	351.65	5.17	20.83	75.57	78.35		-1.30268	0.05196	-0.33062
2	19.71	134.17	5.69	1025.32	372.14	8.09	29.73	85.39	55.16		-0.91386	0.29491	-0.64125
2	27.36	228.62	3.06	1526.23	423.24	18.08	43.38	184.47	40.43		-0.20989	1.0438	-0.48134
2	40.49	275.74	7.89	1358.12	609.58	23.07	66.93	366.63	28.12		0.65385	1.35343	-0.03567
2	58.34	387.84	8.56	1020.31	383.05	29.08	77.37	433.43	14.43		1.19519	0.63543	0.692
2	81.23	27.26	10.58	345.56	292.06	28.23	79.38	448.36	9.35		1.23726	-0.97396	-1.93892
3	13.98	191.21	3.25	809.21	389.52	6.18	26.97	85.23	65.92		-1.09499	0.38454	-0.27313
3	19.24	164.17	4.08	1210.24	394.23	9.95	39.86	89.87	49.67		-0.73732	0.63724	-0.66879
3	27.18	268.62	2.05	1813.12	438.98	19.59	53.97	214.38	34.89		0.01788	1.42892	-0.40385
3	34.24	335.74	5.35	1611.23	672.53	28.36	76.75	389.89	23.12		0.93904	1.94968	0.0429
3	52.05	457.84	5.89	1312.21	391.69	33.19	81.24	453.65	11.21		1.37183	1.11667	0.89658
3	76.24	37.26	8.13	467.32	293.13	32.23	85.34	478.96	8.15		1.36611	-0.71676	-2.17767
	0 is 1a，1 is 5a，2 is 10a，3 is 15a

## Sheet: Membership function
	1y	5y	10y	15y
conducitivy	0.37	0.371	0.378	0.381
MDA	0.439	0.448	0.477	0.451				W1:	0.5283		0.804101		0.804101	0.804101	0.808542	0.851657	0.86432
relative water	0.404	0.409	0.41	0.416				W2	0.3796		0.808542		0.808542
CAT	0.469	0.476	0.486	0.488				W3	0.0921		0.851657		0.851657
SOD	0.452	0.52	0.542	0.547							0.86432		0.86432
POD	0.362	0.371	0.357	0.361
protein	0.42	0.42	0.423	0.435
sugar	0.439	0.439	0.49	0.493
Proline	0.413	0.422	0.51	0.508							0.5283	0.3796	0.0921
	0.418667	0.430667	0.452556	0.453333

## Sheet: CHLOROPHYLL
Index of photosynthetic characteristics
Tree age	1Y	5Y	10Y	15Y
	2.31	3.39	4.45	4.89
	2.58	3.49	4.69	4.69
	2.62	3.88	4.81	5.71
	2.42	3.63	4.82	5.56
