# Supplementary material for: Comprehensive evaluation of physiological response and cold tolerance of domesticated Cinnamomum camphora (L.) Presl under low temperature stress
Source: PeerJ journal article supplement (doi:10.7717/peerj.18590), 2024-11-28
Supplement: RawData.xlsx [file RawData.xlsx]

## Sheet: Relative conducitivy 
Tree age（Unit：%）
Treatment temperature	1y.	5y.	10y.	15y.								4℃	0℃	-5℃	-10℃	-15℃	-20℃
4	26.26	18.98	16.65	13.98							1y.	26.26	30.71	37.36	44.16	63.21	86.43
0	30.71	21.17	19.71	19.24							5y.	18.98	21.17	30.28	42.34	61.28	85.56
-5	37.36	30.28	27.36	27.18							10y.	16.65	19.71	27.36	40.49	58.34	81.23
-10	44.16	42.34	40.49	34.24							15y.	13.98	19.24	27.18	34.24	52.05	76.24
-15	63.21	61.28	58.34	52.05
-20	86.43	85.56	81.23	76.24

## Sheet: raw 
	Measurement indicators
Tree age	conducitivy	CAT	MDA	SOD	POD	protein	sugar	proline	relative water
0	26.26	145.16	12.1	320.35	280.28	3.51	9.64	55.83	95.35
0	30.71	103.26	15.9	380.19	242.24	6.24	15.37	68.95	71.36
0	37.36	179.23	10.53	420.61	344.43	9.44	26.63	95.38	54.67
0	44.16	218.18	25.2	550.26	393.45	14.23	45.49	219.19	43.12
0	63.21	326.53	31.3	315.35	225.26	17.34	52.74	321.28	26.03
0	86.43	24.47	36.47	216.24	231.36	25.15	55.61	381.23	23.03
1	18.98	148.16	9.93	612.21	305.15	4.45	16.82	65.32	88.12
1	21.17	111.26	11.56	721.12	316.26	7.11	27.36	76.96	63.27
1	30.28	179.23	8.64	1156.67	414.59	13.13	40.48	135.32	45.35
1	42.34	248.18	15.42	813.51	518.26	17.07	53.53	236.79	33.12
1	61.28	346.53	19.05	729.12	347.46	22.03	59.48	365.33	15.13
1	85.56	20.47	21.32	226.21	269.84	26.24	68.32	425.93	11.25
2	16.65	161.21	4.11	635.23	351.65	5.17	20.83	75.57	78.35
2	19.71	134.17	5.69	1025.32	372.14	8.09	29.73	85.39	55.16
2	27.36	228.62	3.06	1526.23	423.24	18.08	43.38	184.47	40.43
2	40.49	275.74	7.89	1358.12	609.58	23.07	66.93	366.63	28.12
2	58.34	387.84	8.56	1020.31	383.05	29.08	77.37	433.43	14.43
2	81.23	27.26	10.58	345.56	292.06	28.23	79.38	448.36	9.35
3	13.98	191.21	3.25	809.21	389.52	6.18	26.97	85.23	65.92
3	19.24	164.17	4.08	1210.24	394.23	9.95	39.86	89.87	49.67
3	27.18	268.62	2.05	1813.12	438.98	19.59	53.97	214.38	34.89
3	34.24	335.74	5.35	1611.23	672.53	28.36	76.75	389.89	23.12
3	52.05	457.84	5.89	1312.21	391.69	33.19	81.24	453.65	11.21
3	76.24	37.26	8.13	467.32	293.13	32.23	85.34	478.96	8.15
	0 is 1y.，1 is 5y.，2 is 10y.，3 is 15y.
